# Supplementary material
Source: PubMed Central journal article supplement (PMC2401336)

## Supplemental Figure 1

Metabolic signaling pathway analysis.

Number of proteins associated with metabolic signaling pathways as defined by Ingenuity Pathway Analysis.

Only pathways with five or more proteins associations are shown.

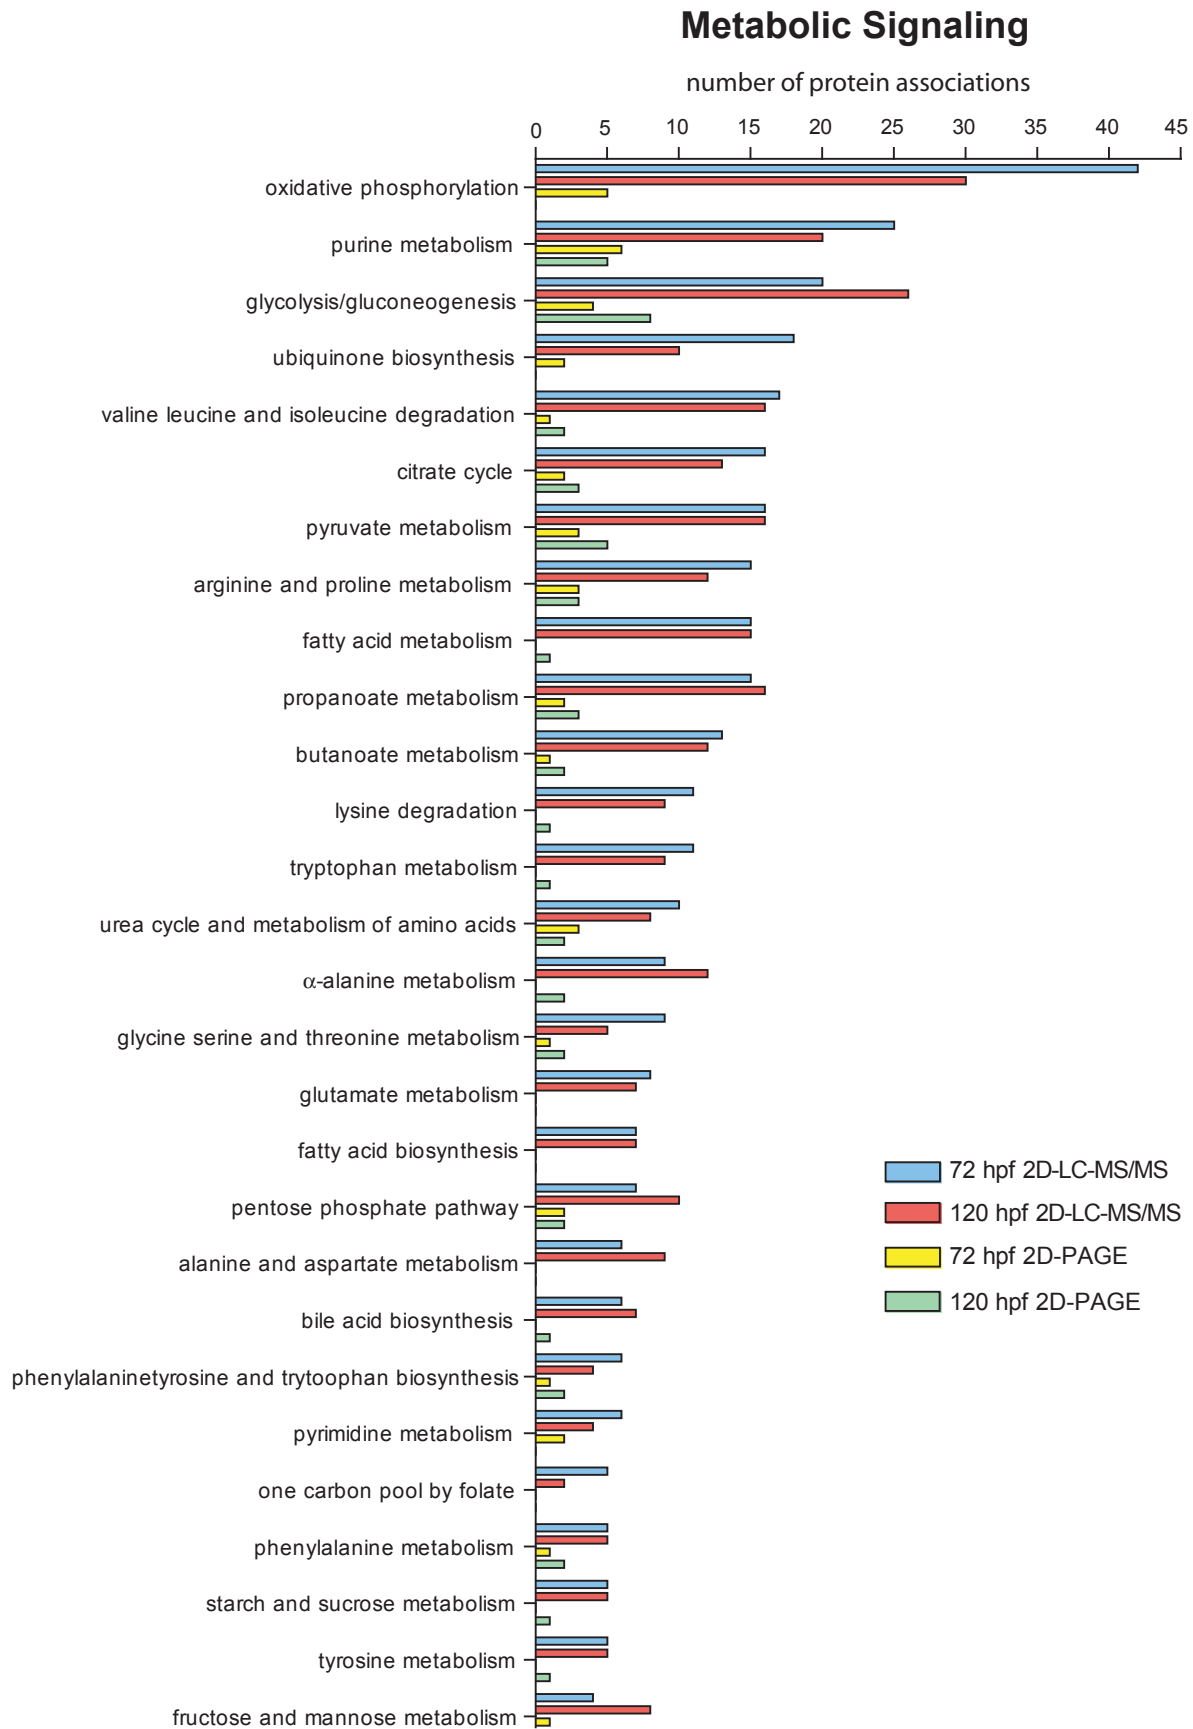

## Supplemental Figure S2

Gene Ontology classification of proteins identified at 72 hpf from 2D-LC-MS/MS and 2D-PAGE.  
(a) molecular function and (b) cellular component.

### a. Molecular Function 72hpf 2DLCMSMS

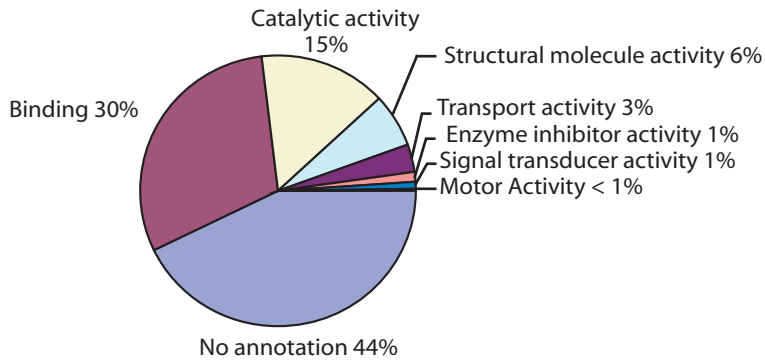

### Molecular Function 72hpf 2DPAGE

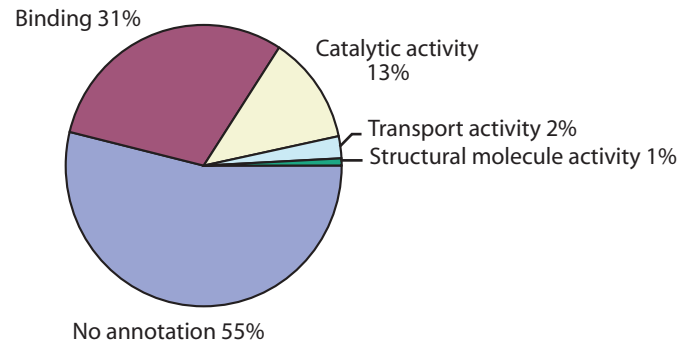

### b. Cellular Component 72hpf 2DLCMSMS

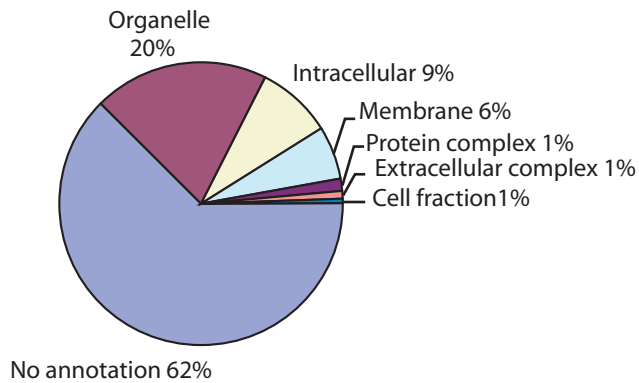

### Cellular Component 72hpf 2DPAGE

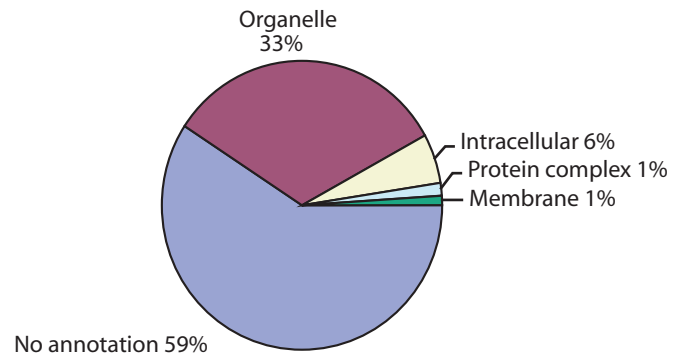

## Supplemental Figure S3

Gene Ontology classification of proteins identified at 120 hpf from 2D-LC-MS/MS and 2D-PAGE. (a) molecular function and (b) cellular component.

**a. Molecular Function 120hpf 2DLCMSMS**

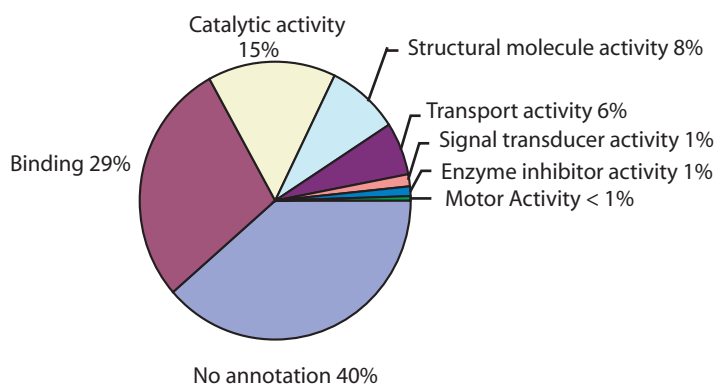

**Molecular Function 120hpf 2DPAGE**

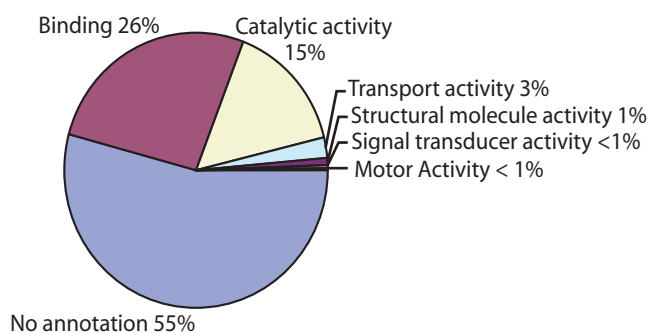

**b. Cellular Component 120hpf 2DLCMSMS**

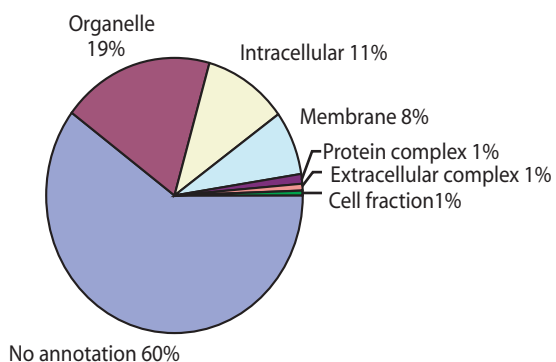

**Cellular Component 120hpf 2DPAGE**

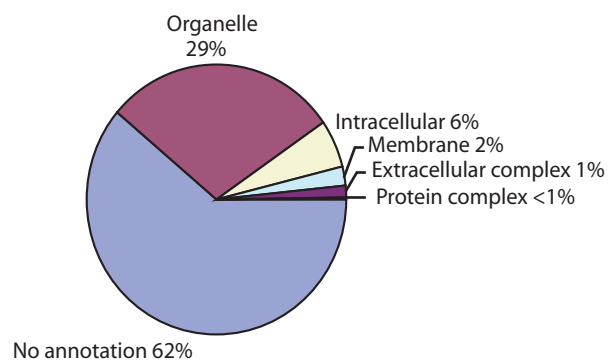

Supplement: M700382-MCP200_1.pdf [file M700382-MCP200_1.pdf]
